# Supplementary material
Source: publisher figshare collection journal article supplement (https://springernature.figshare.com/ndownloader/files/11156624)
Supplement: Supplementary file [file 11156624]

## AMB Express

### **Efficient production of secretory *Streptomyces clavuligerus* $\beta$ -lactamase inhibitory protein (BLIP) in *Pichia pastoris* for restoring resistant Gram-positive bacterial susceptibility to $\beta$ -lactam antibiotics**

Kin-Ho Law<sup>1,†</sup>, Man-Wah Tsang<sup>1,†</sup>, Yuk-Ki Wong<sup>1</sup>, Ming-San Tsang<sup>1</sup>, Pui-Yee Lau<sup>1</sup>, Kwok-Yin Wong<sup>1</sup>, Kwok-Ping Ho<sup>1,\*</sup>, Yun-Chung Leung<sup>1,2,\*</sup>

<sup>1</sup>Department of Applied Biology and Chemical Technology and the State Key Laboratory of Chirosciences, The Hong Kong Polytechnic University, Hung Hom, Kowloon, Hong Kong, China

<sup>2</sup>Lo Ka Chung Centre for Natural Anti-Cancer Drug Development, The Hong Kong Polytechnic University, Hung Hom, Kowloon, Hong Kong, China

<sup>†</sup>These authors contributed equally to this work.

**\*Correspondence:** Prof. Yun-Chung Leung, Department of Applied Biology and Chemical Technology, The Hong Kong Polytechnic University, Hung Hom, Kowloon, Hong Kong, China

**E-mail:** [thomas.yun-chung.leung@polyu.edu.hk](mailto:thomas.yun-chung.leung@polyu.edu.hk)

**\*Additional correspondence:** Dr. Kwok-Ping Ho, Department of Applied Biology and Chemical Technology, The Hong Kong Polytechnic University, Hung Hom, Kowloon, Hong Kong, China

**E-mail:** [kwok-ping.ho@connect.polyu.edu.hk](mailto:kwok-ping.ho@connect.polyu.edu.hk)

## **Methods. Production of TEM-1 $\beta$ -lactamase**

A single colony of *E. coli* BL21(DE3) harboring pRSET-K/TEM-1  $\beta$ -lactamase was inoculated into 5 mL of 2 $\times$ TY medium with 50  $\mu$ g/mL kanamycin and cultivated at 37°C for 14 – 16 h with shaking at 250 rpm. After that, 1 mL of the pre-culture was transferred into 100 mL of 2 $\times$ TY medium and incubated at 37°C with shaking at 250 rpm. When OD<sub>600</sub> of the culture was 0.8, 0.3 mM IPTG was added to the culture to induce the expression of TEM-1  $\beta$ -lactamase. The culture was then incubated at 37°C with shaking at 250 rpm for an additional of 4 h. Afterward, the cells were collected by centrifugation at 10,000g at 4°C for 30 min. The cells were resuspended in 10 mL of solubilization buffer (20 mM Tris-HCl, 0.2 M sodium chloride, pH 7.4) with 75  $\mu$ g/mL lysozyme and incubated at 30°C for 45 min. Then the cells were lysed by sonication. Bacterial cell lysate was then subjected to centrifugation at 18,000g for 30 min at 4°C. The cell lysate was loaded onto a 5 mL of HiTrap Chelating column charged with nickel for purification. Histidine-tagged TEM-1  $\beta$ -lactamase was eluted with a linear gradient elution from 0 – 0.5 M imidazole in 20 mM sodium phosphate buffer (pH 7.4). Fractions containing TEM-1  $\beta$ -lactamase were pooled, dialyzed against 10 mM ammonium bicarbonate and lyophilized.

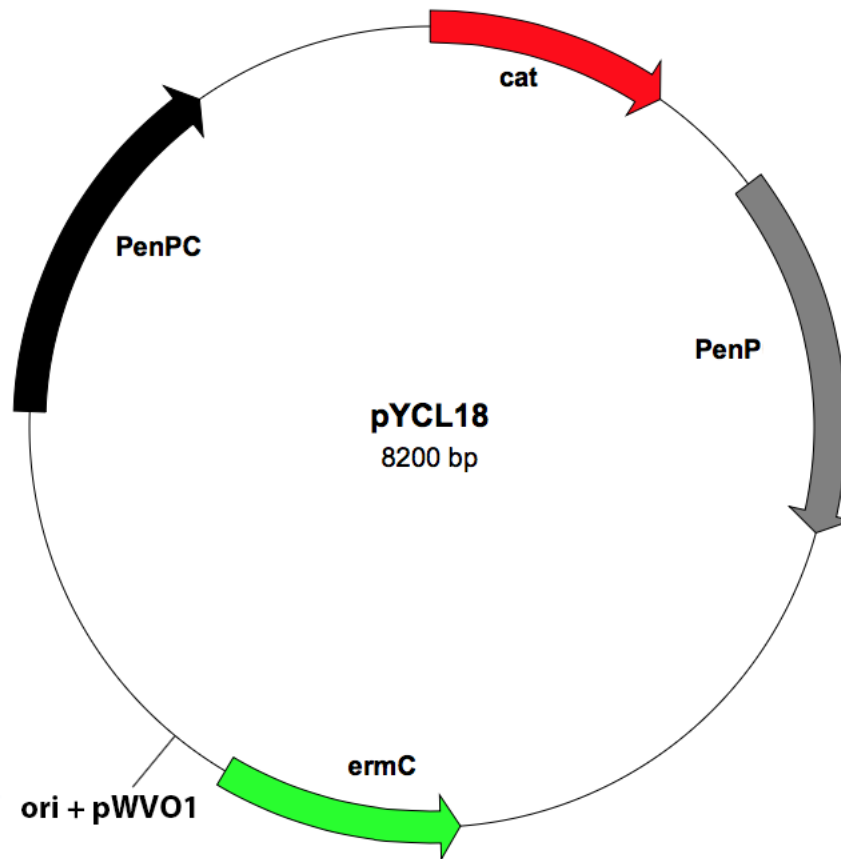

**Figure. S1.** Plasmid map of the *E. coli*/*B. subtilis* shuttle plasmid pYCL18. *cat* chloramphenicol acetyltransferase gene, *ermC* Erythromycin resistant marker, *PenP*  $\beta$ -lactamase gene from *Bacillus licheniformis*, *PenPC*  $\beta$ -lactamase gene from *Bacillus cereus*, and *ori + pWVO1* The plus origin of replication of pWVO1, a plasmid that replicates via a rolling-circle mode of replication.
